# Supplementary material
Source: PubMed Central journal article supplement (PMC8495188)
Supplement: 11126_2021_9955_MOESM1_ESM.pdf [file 11126_2021_9955_MOESM1_ESM.pdf]

## **Worries About COVID-19 Questions**

How much do you worry about the following clerkship related fears? (1, Not worried at all; 2, Rarely worried; 3, Sometimes worried; 4, Often worried; 5, Worried nearly all the time)

1. Getting infected with COVID
2. Not knowing if I have COVID
3. Infecting patients with COVID
4. Infecting colleagues with COVID
5. Infecting family with COVID
6. Having to make extremely difficult decisions involving prioritizing health/survival of one patient over another with COVID
7. Not having sufficient personal protective equipment in caring for COVID patients
8. Not having sufficient medical equipment to treat patients with COVID
9. Not having enough medical knowledge or experience to take adequate care of COVID patients
10. Not being able to do enough for my patients
11. Becoming overwhelmed with excessive workload
12. The uncertainty of my schedule
13. My ability to access healthy food at the hospital
14. Accommodations if isolation is needed or I can't go home
15. Becoming seriously ill from COVID
16. Dying from COVID

How much do you worry about the following personal concerns? (1, Not worried at all; 2, Rarely worried; 3, Sometimes worried; 4, Often worried; 5, Worried nearly all the time)

17. Not being able to visit or assist loved ones who are ill or become ill with COVID
18. Not knowing how COVID might affect my finances
19. Not knowing how COVID might affect my personal relationships
20. Not knowing how COVID might affect my ability to care for my children/dependents
21. Not knowing how COVID might affect my career
